# Supplementary material for: IgG3 subclass antibodies recognize antigenically drifted influenza viruses and SARS-CoV-2 variants through efficient bivalent binding
Source: PubMed Central journal article supplement — bioRxiv. 2022 Sep 28:2022.09.27.509738. Preprint. [Version 1] doi: 10.1101/2022.09.27.509738 (PMC9536032; doi:10.1101/2022.09.27.509738), 2022-09-28
Supplement: NIHPP2022.09.27.509738V1-supplement-1.pdf [file NIHPP2022.09.27.509738V1-supplement-1.pdf]

**Fig. S1. Antibody species generated in this study.** (Top) Schematics depicting how full-length, F(ab')<sub>2</sub>, and F(ab) monoclonal antibody species were generated in this study. (Bottom) Representative reducing SDS-PAGE analysis of one antibody, 10053-1G05, expressed as IgG1, IgG2, and IgG3 for each of the mAb species. Heavy and light chains are indicated.

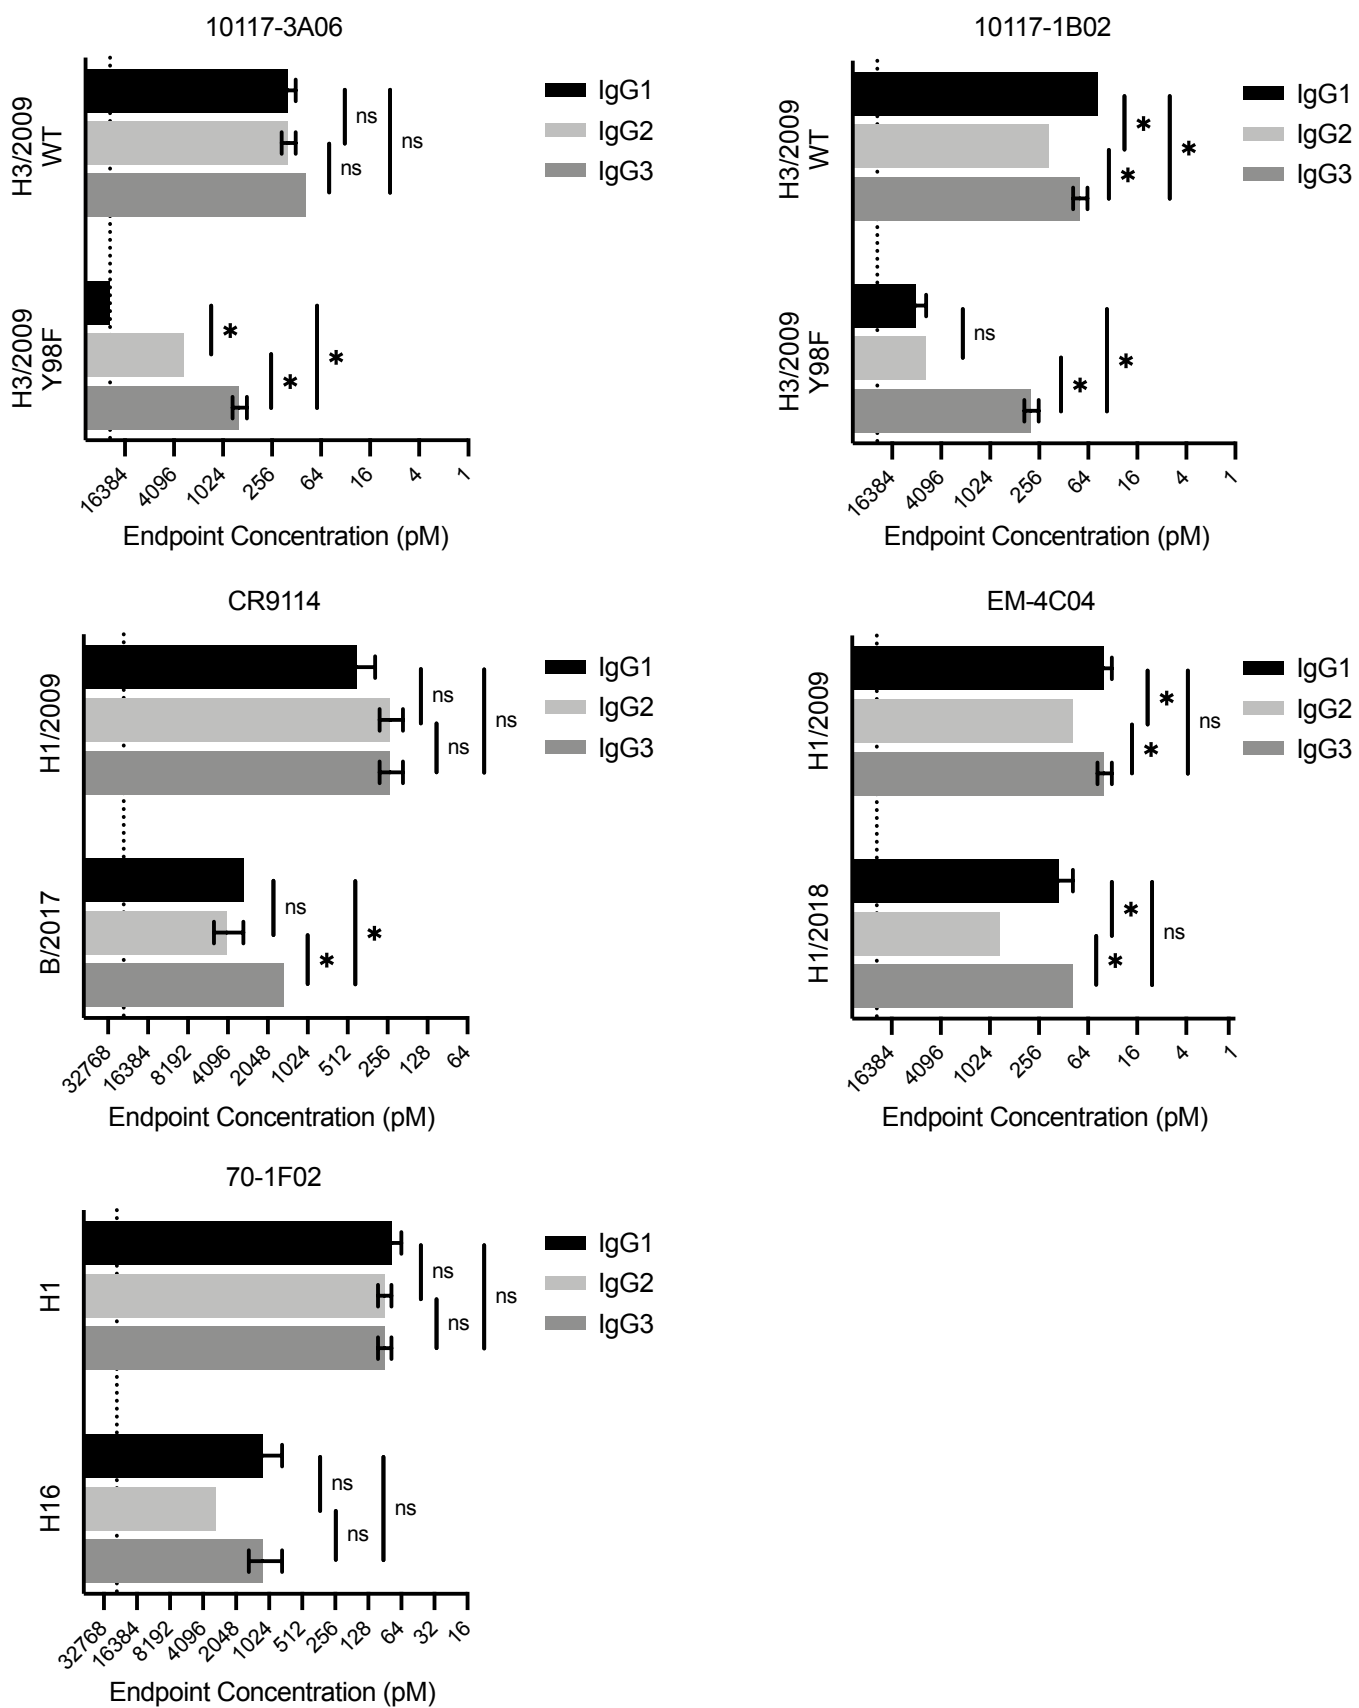

**Fig. S2. Influenza mAbs retain binding capacity to drifted influenza virus antigens when expressed as IgG3.** ELISAs were completed with mAbs expressed as different IgG subclasses against antigens that reduce binding capacity of the mAb. ELISA binding values are shown as the mean endpoint concentration, with error bars indicating the SEM for 2-3 independent experiments. Dotted line indicates the limit of detection for the assay. Statistical comparison of the IgG subclasses for each antigen were completed using a one-way ANOVA on  $\log_2$  transformed values with Tukey's multiple comparisons post-test. \* $p < 0.05$
